# Supplementary material for: Fabrication of cell-compatible hyaluronan hydrogels with a wide range of biophysical properties through high tyramine functionalization
Source: Royal Society of Chemistry journal article supplement (doi:10.1039/c6tb03161g), 2017-01-01
Supplement: c6tb03161g1.pdf [file c6tb03161g1.pdf]

## Supporting Information

### **Fabrication of Cell-Compatible Hyaluronan Hydrogels with a Wide Range of Biophysical Properties Through High Tyramine Functionalization**

*Claudia Loebel<sup>1,2,†</sup>, Tino Stauber<sup>2</sup>, Matteo D'Este<sup>1</sup>, Mauro Alini<sup>1</sup>, Marcy Zenobi-Wong<sup>2</sup>, David Eglin<sup>1\*</sup>*

<sup>1</sup>AO Research Institute Davos, Clavadelerstrasse 8, Davos Platz, 7270, Switzerland

<sup>2</sup>ETH Zurich, Cartilage Engineering + Regeneration, Department of Health, Science and Technology, Otto-Stern-Weg 7, Zürich, 8093, Switzerland

† Current address: Department of Bioengineering, University of Pennsylvania, Philadelphia, Pennsylvania 19104, United States, loebelcl@seas.upenn.edu

\*Corresponding author: AO Research Institute Davos, Clavadelerstrasse 8, Davos Platz, 7270, Switzerland, david.eglin@aofoundation.org

### Synthesis of HA-Tyr conjugates by conventional carbodiimide chemistry

HA-Tyr was prepared by amidation of the carboxylic acid groups of HA with the amine groups of Tyr as described previous.<sup>1</sup> HANA (500 mg, 1.25 mmol carboxyl groups) was hydrated in MES Buffer (100 mM, pH 5.5, adjusted with NaOH 5 M) for 24 h at a final concentration of 1% (w/v). 1-Ethyl-3-(3-dimethylaminopropyl)carbodiimide (EDC) and N-hydroxysuccinimide (NHS) (1/1 to HA) were added and stirred for 1 h at RT. Tyr (1/1 to HA) was dissolved in MES-buffer (100 mM, pH 5.5; 0.1% w/v) and added drop-wise to the HA-solution. The reaction was maintained at RT for 24 h under continuous stirring. Products were precipitated by 96% ethanol. For two-step HA-Tyr conjugation, the isolated HA-Tyr product was isolated and rehydrated in 100 mM MES-buffer (pH 5.5) and the conjugation repeated. Note, that the product after 48 h was highly viscous when dissolved in PBS (1% w/v). This may be caused by a high percentage of auto-crosslinked EDC-Tyr adducts, as shown by improved solubility in alkaline conditions (pH 8).

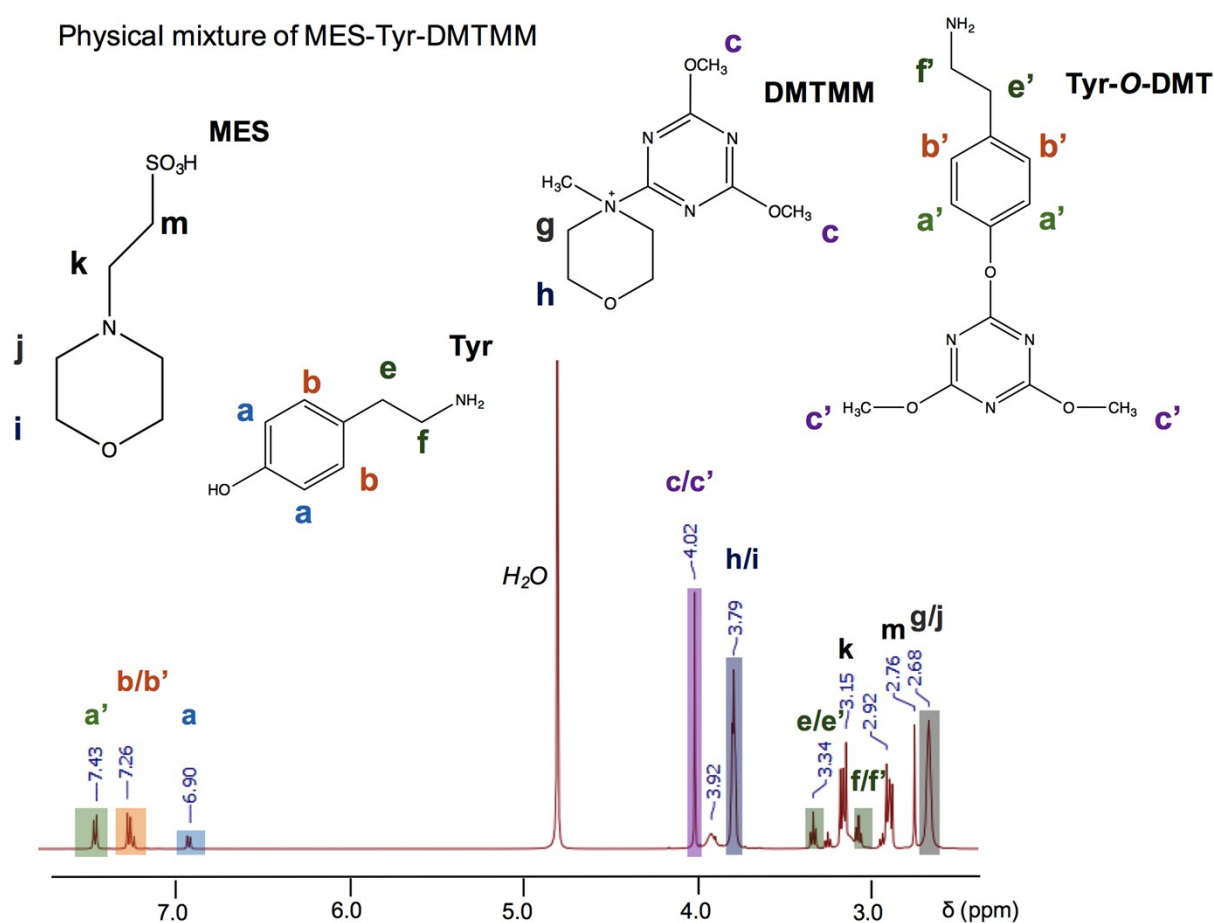

**Figure S1.** <sup>1</sup>H NMR spectrum of the physical mixture MES, DMTMM and Tyr (0.025 mmol each, without additional chemical modifications) in D<sub>2</sub>O. Measurements were taken after 24 h incubation at RT.

HA-Tyr synthesized in 100 mM NaCl

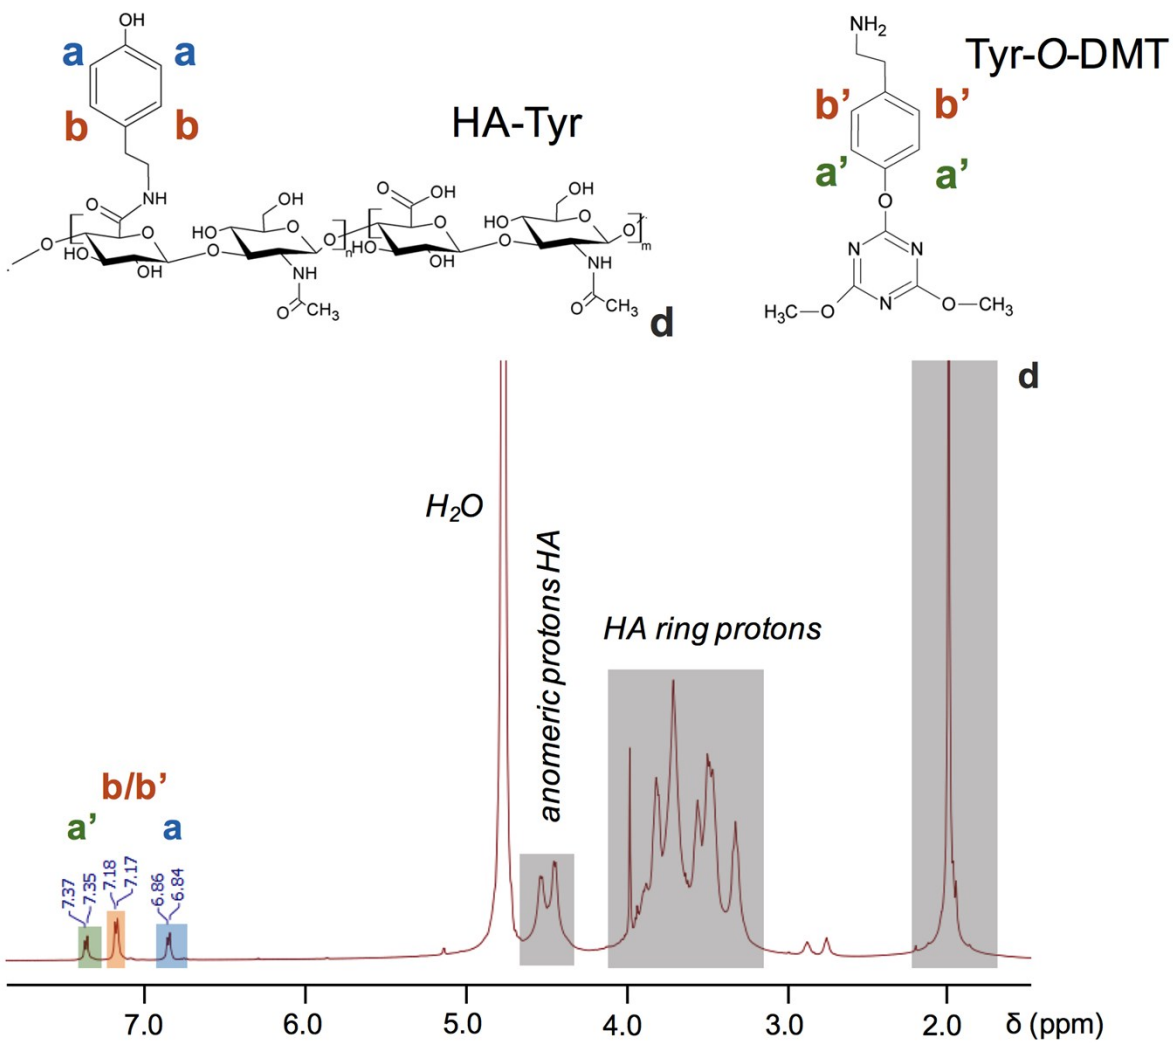

Figure S2. <sup>1</sup>H NMR spectrum of the conjugate HA-Tyr synthesized in 100 mM NaCl at 37 °C for 24 h.

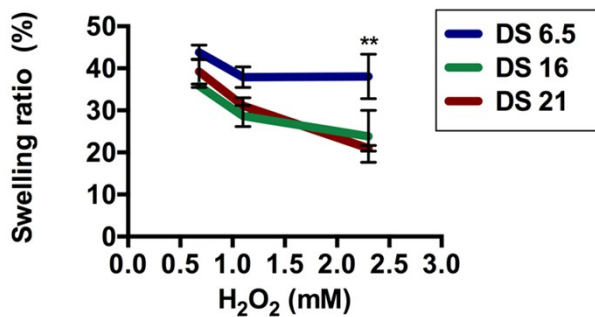

**Figure S3.** Swelling of HA-Tyr hydrogels with different DS as a function of H<sub>2</sub>O<sub>2</sub> concentration. Hydrogels were formed with 0.5 U/ml HRP. Data shown as mean ± SD for n = 3 constructs, \*\*p<0.01 for DS 6.5% compared to DS 16 and 21%.

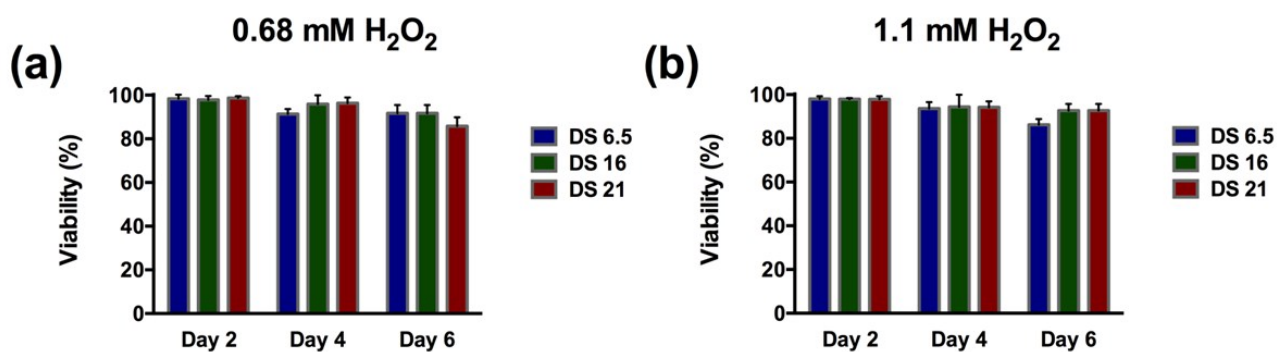

**Figure S4.** Quantification of cell viability of MSCs ( $5 \times 10^6$ /ml) encapsulated in HA-Tyr hydrogels crosslinked with (a) 0.68 mM H<sub>2</sub>O<sub>2</sub> and (b) 1.1 mM H<sub>2</sub>O<sub>2</sub>, after 2, 4 and 6 days of culture in basal medium (DMEM plus 10% FBS), mean + SD of four randomly chosen locations per hydrogel. One representative donor shown with mean + SD of n = 4 randomly chosen locations within the constructs.

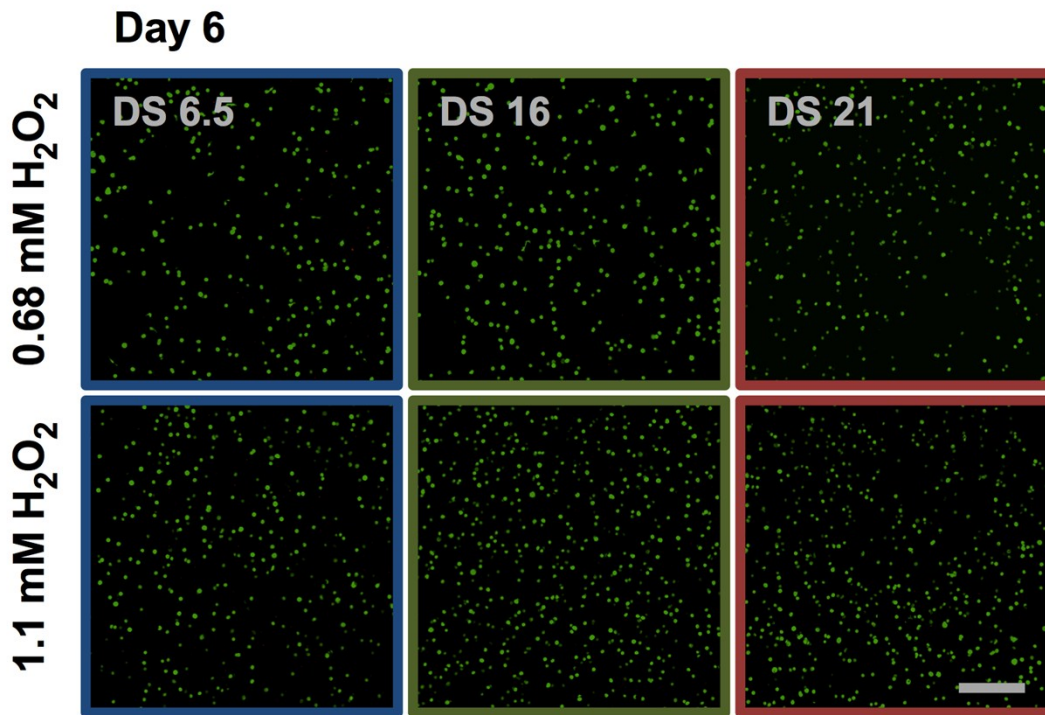

**Figure S5.** Representative images of hMSCs encapsulated in HA-Tyr hydrogels ( $5 \times 10^6/\text{ml}$ ) crosslinked with 0.68 mM and 1.1 mM H<sub>2</sub>O<sub>2</sub>. Calcein (5  $\mu\text{M}$ , green) /Ethidium homodimer (8  $\mu\text{M}$ , red) staining after 6 days of culture. Images are shown as 3D rendered z-stacks with a thickness of 200  $\mu\text{m}$ , Scale bar 200  $\mu\text{m}$ .

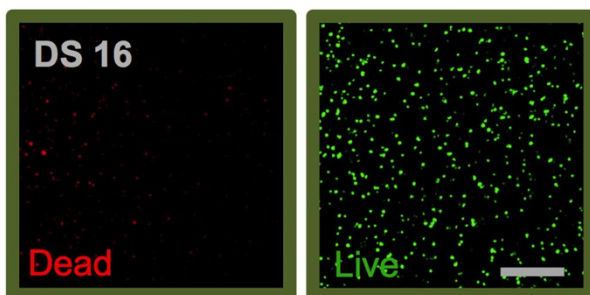

**Figure S6.** Representative images of encapsulated hMSCs in HA-Tyr (DS 16, 0.68 mM H<sub>2</sub>O<sub>2</sub>) after 6 days of culture without FBS and staining with Calcein (5  $\mu\text{M}$ , green) /Ethidium homodimer (8  $\mu\text{M}$ , red). Images are shown as 3D rendered z-stacks with a thickness of 200  $\mu\text{m}$ . Scale bar 200  $\mu\text{m}$ .

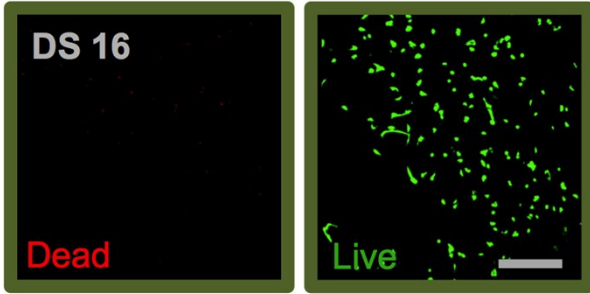

**Figure S7.** Representative images of encapsulated hMSCs in HA-Tyr *in-situ* modified with 500  $\mu\text{M}$  RGD-Tyrosine (Genscript) after 6 days of culture and staining with Calcein (5  $\mu\text{M}$ , green) /Ethidium homodimer (8  $\mu\text{M}$ , red). Images are shown as 3D rendered z-stacks with a thickness of 200  $\mu\text{m}$ . Scale bar 200  $\mu\text{m}$ .

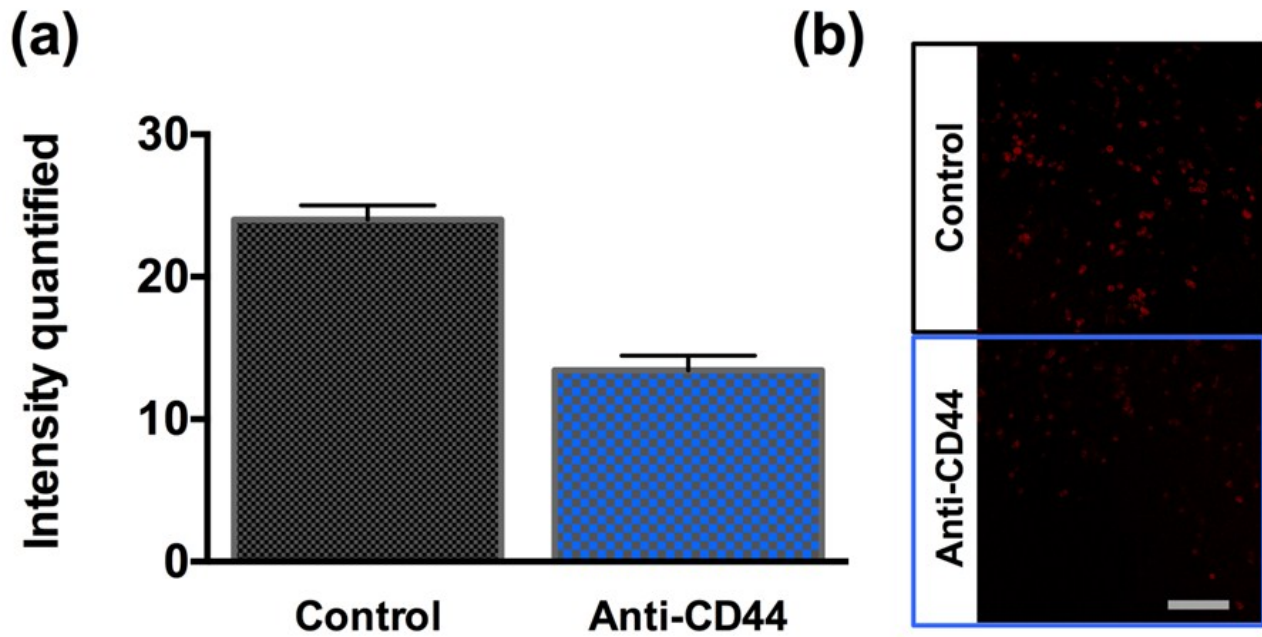

**Figure S8.** (a) Quantification of CD44 expression intensity and (b) representative images of hMCS after incubation with anti-CD44 antibody (abcam 10-44-2).  $5 \times 10^6$  cells/ml, encapsulated in DS 16% HA-Tyr hydrogels crosslinked with 1 U/ml HRP and 0.68 mM  $\text{H}_2\text{O}_2$ . Cell-laden hydrogels were fixed 30 min after encapsulation with 4% paraformaldehyde (overnight at 4  $^\circ\text{C}$ ) and washed three times prior incubation with anti-CD44-Allophycocyanin (APC) antibody (Miltenyi Biotec 130-095-177). Confocal images were taken using a Zeiss LSM510 (10x objective). Scale bar 200  $\mu\text{m}$ .

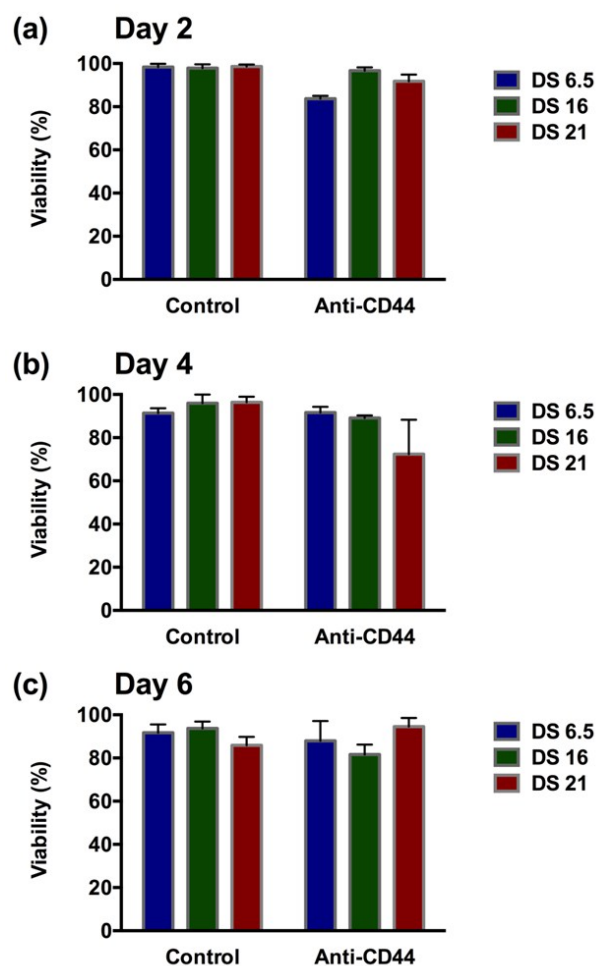

**Figure S9.** Quantification of cell viability of encapsulated hMSCs ( $5 \times 10^6/\text{ml}$ ,  $0.68 \text{ mM H}_2\text{O}_2$ ), blocked with CD44 antibody prior encapsulation compared to un-treated MSCs (control), after **(a)** 2 days, **(b)** 4 days and **(c)** 6 days of culture in basal medium (DMEM plus 10% FBS). One representative donor shown with mean + SD of  $n = 4$  randomly chosen locations within the construct.

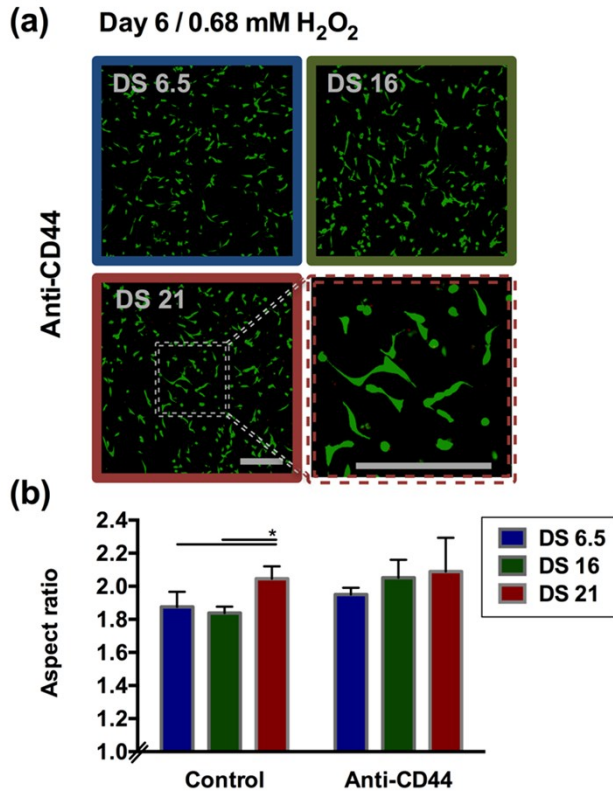

**Figure S10.** (a) Representative images of encapsulated hMSCs treated with CD44 antibody prior encapsulation and stained with Calcein (5  $\mu$ M, green) /Ethidium homodimer (8  $\mu$ M, red) after 6 days of culture. Images are shown as 3D rendered z-stacks with a thickness of 200  $\mu$ m. Dashed box shows a zoom-in of the corresponding area, scale bars are 200  $\mu$ m. (b) Quantification of cell aspect ratio of encapsulated hMSCs ( $5 \times 10^6$ /ml, 0.68 mM H<sub>2</sub>O<sub>2</sub>), blocked with CD44 antibody prior encapsulation compared to un-treated MSCs (control), after 6 days of culture in basal medium (DMEM plus 10% FBS). One representative donor shown with mean + SD of n = 4 randomly chosen locations within the construct ( $\geq 50$  cells per image), \*p<0.05.

## REFERENCES

1. C. Loebel, M. D'Este, M. Alini, M. Zenobi-Wong and D. Eglin, *Carbohydr Polym*, 2015, **115**, 325-333.
